# Supplementary material for: SOX4 facilitates PGR protein stability and FOXO1 expression conducive for human endometrial decidualization
Source: eLife journal article supplement (doi:10.7554/elife.72073), 2022-03-04
Supplement: supp [file Figure 2A.xlsx]

## Sheet: Sheet1
Expression of SOX4 mRNA in the presence of MPA or MPA+RU486 for 2 days in immortalized HESCs.
relative to Gapdh(△△CT)
		SOX4		Control		MPA		MPA+RU486
				0.00598025		0.020586		0.0051708
				0.00414008		0.018		0.00525818
				0.00457243		0.015		0.00395724
				0.00376151		0.016		0.00676151
	biological replicates
	Results were presented as means ±SEM; One-Way Anova; * indicates P<0.05，**indicates P<0.005，*** indicates P<0.0001
