# Supplementary material for: SOX4 facilitates PGR protein stability and FOXO1 expression conducive for human endometrial decidualization
Source: eLife journal article supplement (doi:10.7554/elife.72073), 2022-03-04
Supplement: supp [file Figure 2B.xlsx]

## Sheet: Sheet1
RNA level of PGR after siRNA mediated knockdown.
relative to Gapdh(△△CT)
	PGR			Control		siPGR
				0.00034		5.9e-05
				0.00035		6.9e-05
				0.00031		4.9e-05
	biological replicates
	Results were presented as means ±SEM; Student’s t-test; * indicates P<0.05,** indicates P<0.005,*** indicates P<0.0001
