# Supplementary material for: SOX4 facilitates PGR protein stability and FOXO1 expression conducive for human endometrial decidualization
Source: eLife journal article supplement (doi:10.7554/elife.72073), 2022-03-04
Supplement: supp [file Figure 2C.xlsx]

## Sheet: Sheet1
Expression of SOX4 mRNA in the presence of MPA for 2 days with PGR knockdown
relative to Gapdh(△△CT)
		PGR		Control		MPA+siControl		MPA+siPGR
				0.00498025		0.020591		0.0052
				0.00514008		0.0191473		0.00525818
				0.00357243		0.0184424		0.00398025
				0.00476151		0.0211595		0.00514008
	biological replicates
	Results were presented as means ±SEM; One-Way Anova, * indicates P<0.05,** indicates P<0.005,*** indicates P<0.0001.
