# Supplementary material for: SOX4 facilitates PGR protein stability and FOXO1 expression conducive for human endometrial decidualization
Source: eLife journal article supplement (doi:10.7554/elife.72073), 2022-03-04
Supplement: supp [file Figure 2D.xlsx]

## Sheet: Sheet1
Band quantification of PGR and SOX4 protein after PGR knock down
relative density over GAPDH
				PGR						SOX4
				siControl	3.27124	2.5457	2.43535			siControl	1.68213	0.905392	1.59079
				siPGR	1.02083	0.350768	0.287074			siPGR	0.75727	0.433783	0.505703
	biological replicates
	Results were presented as means ±SEM; Student’s t-test; * indicates P<0.05,** indicates P<0.005,*** indicates P<0.0001.
