# Supplementary material for: SOX4 facilitates PGR protein stability and FOXO1 expression conducive for human endometrial decidualization
Source: eLife journal article supplement (doi:10.7554/elife.72073), 2022-03-04
Supplement: supp [file Figure 2F.xlsx]

## Sheet: Sheet1
ChIP -QPCR of potential PGR binding on SOX4
Relative Enrichment over Input
				IgG				PGR
				0.966	1.3	1.1		16.3	15.04	13.3
	biological replicates
	Results were presented as means ±SEM; Student’s t-test;* indicates P<0.05,** indicates P<0.005,*** indicates P<0.0001.
