# Supplementary material for: SOX4 facilitates PGR protein stability and FOXO1 expression conducive for human endometrial decidualization
Source: eLife journal article supplement (doi:10.7554/elife.72073), 2022-03-04
Supplement: supp [file Figure 2G.xlsx]

## Sheet: Sheet1
Luciferase activity assay of SOX4 promotor in the presence of MPA and PGR in 293T cells.
Analysis was performed from intra-group comparison of pGL3-Basic
				pCMV-HA		pCMV-HA-PGR		pCMV-HA-PGR
				MPA				MPA
				pGL3-SOX4		pGL3-SOX4		pGL3-SOX4
				0.95		0.9501		3
				1.01		1.07		2.8
				1.09		1.02		2.5
	biological replicates
	Results were presented as means ±SEM; One-Way Anova; * indicates P<0.05,** indicates P<0.005,*** indicates P<0.0001.
