# Supplementary material for: SOX4 facilitates PGR protein stability and FOXO1 expression conducive for human endometrial decidualization
Source: eLife journal article supplement (doi:10.7554/elife.72073), 2022-03-04
Supplement: supp [file Figure 3A.xlsx]

## Sheet: Sheet1
mRNA levels of PRL in undecidualized and decidualized immortalized HESCs after SOX4 knockout at indicated time points after the E2, MPA and cAMP treatment.
relative to Gapdh(△△CT)
				WT				KO
	PRL		D0	3.86e-05	5.94e-05	2.96e-05		2.83e-05	1.82e-05	3.92e-05
			D2	0.0012995	0.002511	0.001585		0.000512	0.000811	0.000411
			D4	0.009051	0.006547	0.006048		0.001394	0.001893	0.002994
			D6	0.018614	0.0215	0.018915		0.00517	0.00414	0.00616
	biological replicates
	Results were presented as means ±SEM; Student’s t-test; * indicates P<0.05, ** indicates P<0.005, *** indicates P<0.0001
