# Supplementary material for: SOX4 facilitates PGR protein stability and FOXO1 expression conducive for human endometrial decidualization
Source: eLife journal article supplement (doi:10.7554/elife.72073), 2022-03-04
Supplement: supp [file Figure 3B.xlsx]

## Sheet: Sheet1
mRNA levels of IGFBP1 in undecidualized and decidualized immortalized HESCs after SOX4 knockout at indicated time points after the E2, MPA and cAMP treatment.
relative to Gapdh(△△CT)
	IGFBP1
				WT				KO
			D0	0.000396	0.000594	0.000394		0.000104	0.000206	0.000304
			D2	0.009963	0.005964	0.008965		0.004157	0.001158	0.003158
			D4	0.075418	0.095418	0.085419		0.02248	0.014478	0.032479
			D6	0.135796	0.125802	0.15796		0.021919	0.05192	0.06192
	biological replicates
	Results were presented as means ±SEM; Student’s t-test; * indicates P<0.05, ** indicates P<0.005, *** indicates P<0.0001
