# Supplementary material for: SOX4 facilitates PGR protein stability and FOXO1 expression conducive for human endometrial decidualization
Source: eLife journal article supplement (doi:10.7554/elife.72073), 2022-03-04
Supplement: supp [file Figure 3C.xlsx]

## Sheet: Sheet1
Protein levels of IGFBP1 in undecidualized and decidualized Immortalized HESCs after SOX4 knockout at indicated time points.
relative density over GAPDH
			WT						KO-SOX4
		SOX4	D0	0.566067	0.357334	0.737468		SOX4	D0	0.00300296	0.00109188	0.00295777
			D2	1.30529	1.36072	1.12715			D2	0.00308043	0.00335835	0.00313391
			D4	1.48066	1.44213	1.31949			D4	0.00204418	0.0031943	0.00348205
			D6	2.52287	1.63849	1.59762			D6	0.0024111	0.00418827	0.00212995
		IGFBP1	D0	0.00282635	0.0026201	0.00258208		IGFBP1	D0	0.00164734	0.00101823	0.00143597
			D2	0.725875	0.809064	0.497047			D2	0.263542	0.485456	0.171837
			D4	1.01323	1.28606	0.905587			D4	0.548746	0.789892	0.309172
			D6	1.81449	1.88521	1.6103			D6	0.378588	0.858531	0.191539
	biological replicates
	Results were presented as means ±SEM; Student’s t-test; * indicates P<0.05, ** indicates P<0.005, *** indicates P<0.0001
