# Supplementary material for: SOX4 facilitates PGR protein stability and FOXO1 expression conducive for human endometrial decidualization
Source: eLife journal article supplement (doi:10.7554/elife.72073), 2022-03-04
Supplement: supp [file Figure 3D.xlsx]

## Sheet: Sheet1
after SOX4 overexpression PRL in undecidualized or decidualized Immortalized HESCs for 4 days.
relative to Gapdh(△△CT)
	PRL
				control				overexpression SOX4
			D0	0.00025	0.0002	0.0003		0.0002	0.00027	0.00033
			D4	0.0045	0.004	0.006		0.009	0.012	0.011
	biological replicates
	Results were presented as means ±SEM; Student’s t-test; * indicates P<0.05,** indicates P<0.005,*** indicates P<0.0001.
