# Supplementary material for: SOX4 facilitates PGR protein stability and FOXO1 expression conducive for human endometrial decidualization
Source: eLife journal article supplement (doi:10.7554/elife.72073), 2022-03-04
Supplement: supp [file Figure 3E.xlsx]

## Sheet: Sheet1
after SOX4 overexpression IGFBP1 (mRNA) in undecidualized or decidualized Immortalized HESCs for 4 days.
relative to Gapdh(△△CT)
	IGFBP1
				control				overexpression SOX4
			D0	0.0032	0.0023	0.002		0.0027	0.0015	0.003
			D4	0.04	0.05	0.045		0.077	0.09	0.08
	biological replicates
	Results were presented as means ±SEM; Student’s t-test; ** indicates P<0.005,
