# Supplementary material for: SOX4 facilitates PGR protein stability and FOXO1 expression conducive for human endometrial decidualization
Source: eLife journal article supplement (doi:10.7554/elife.72073), 2022-03-04
Supplement: supp [file Figure 3F.xlsx]

## Sheet: Sheet1
Protein levels of SOX4 and IGFBP1 in decidualized Immortalized HESCs for 4 days with control or SOX4 overexpression. Band quantification of SOX4 and IGFBP1 protein, relative to GAPDH.
relative density over GAPDH
			SOX4	D0	0.411969	0.490986	0.587441
				D4	0.770689	1.25808	1.30004
			IGFBP1	D0	0.443085	0.598523	0.53951
				D4	0.949167	1.48449	1.13024
	biological replicates
	Results were presented as means ±SEM; Student’s t-test; * indicates P<0.05, ** indicates P<0.005, *** indicates P<0.0001
