# Supplementary material for: SOX4 facilitates PGR protein stability and FOXO1 expression conducive for human endometrial decidualization
Source: eLife journal article supplement (doi:10.7554/elife.72073), 2022-03-04
Supplement: supp [file Figure 4H.xlsx]

## Sheet: Sheet1
ChIP-qPCR assay of SOX4 binding on STAT3
Relative to Input
				IgG				STAT3
				1	1	1		22.04	18.37	30
	biological replicates
	Results were presented as means ±SEM; Student’s t-test;* indicates P<0.05,** indicates P<0.005,*** indicates P<0.0001
