# Supplementary material for: SOX4 facilitates PGR protein stability and FOXO1 expression conducive for human endometrial decidualization
Source: eLife journal article supplement (doi:10.7554/elife.72073), 2022-03-04
Supplement: supp [file Figure 4I.xlsx]

## Sheet: Sheet1
ChIP-qPCR assay of SOX4 binding on FOXO1
Relative to Input
				IgG				FOXO1
				1	1	1		11.64	10.55	3.24
	biological replicates
	Results were presented as means ±SEM; Student’s t-test;* indicates P<0.05,** indicates P<0.005,*** indicates P<0.0001
