# Supplementary material for: SOX4 facilitates PGR protein stability and FOXO1 expression conducive for human endometrial decidualization
Source: eLife journal article supplement (doi:10.7554/elife.72073), 2022-03-04
Supplement: supp [file Figure 4M.xlsx]

## Sheet: Sheet1
mRNA levels of FOXO1 in SOX4 knockout undecidualized and decidualized HESCs at indicated time points.
relative to Gapdh(△△CT)
				WT				KO-SOX4
	FOXO1		D0	0.000395	0.000395	0.000195		0.000136	0.000206	0.000156
			D2	0.035337	0.045337	0.055337		0.009848	0.006848	0.004848
			D4	0.104268	0.124268	0.144268		0.027198	0.047198	0.037198
			D6	0.154268	0.184268	0.179427		0.036775	0.059775	0.067775
	biological replicates
	Results were presented as means ±SEM; Student’s t-test; * indicates P<0.05, ** indicates P<0.005, *** indicates P<0.0001
