# Supplementary material for: SOX4 facilitates PGR protein stability and FOXO1 expression conducive for human endometrial decidualization
Source: eLife journal article supplement (doi:10.7554/elife.72073), 2022-03-04
Supplement: supp [file Figure 4N.xlsx]

## Sheet: Sheet1
Protein levels of SOX4, FOXO1 and IGFBP1 in SOX4 knockout undecidualized and decidualized HESCs at indicated time points. Band quantification of indicated proteins, relative to loading control GAPDH.
relative density over GAPDH
			WT						KO-SOX4
		SOX4	D0	0.566067	0.41741	0.737468		SOX4	D0	0.00300296	0.00257943	0.00295777
			D2	1.30529	0.964292	1.12715			D2	0.00308043	0.00423691	0.00483391
			D4	1.38066	0.986725	1.31949			D4	0.00204418	0.00545872	0.00348205
			D6	2.52287	1.79936	1.59762			D6	0.0024111	0.00177805	0.00212995
		IGFBP1	D0	0.00282635	0.00272002	0.00258208		IGFBP1	D0	0.00164734	0.00163053	0.00143597
			D2	0.165875	0.246982	0.257047			D2	0.093542	0.1071	0.121837
			D4	1.01323	0.888629	0.805587			D4	0.548746	0.61082	0.209172
			D6	1.81449	1.37562	1.6103			D6	0.378588	0.557308	0.191539
		FOXO1	D0	0.0069962	0.00129628	0.00225255		FOXO1	D0	0.0060812	0.0068506	0.0095067
			D2	0.81223	0.632655	1.03106			D2	0.455279	0.344129	0.434185
			D4	0.848841	1.07779	1.52438			D4	0.511511	0.393212	0.682853
			D6	1.23972	1.35274	2.02385			D6	0.71515	0.302009	0.903672
	biological replicates
	Results were presented as means ±SEM; Student’s t-test; * indicates P<0.05, ** indicates P<0.005, *** indicates P<0.0001
