# Supplementary material for: SOX4 facilitates PGR protein stability and FOXO1 expression conducive for human endometrial decidualization
Source: eLife journal article supplement (doi:10.7554/elife.72073), 2022-03-04
Supplement: supp [file Figure 4O.xlsx]

## Sheet: Sheet1
mRNA levels of FOXO1 after SOX4 overexpression in undecidualized or decidualized HESCs for 4 days.
relative to Gapdh(△△CT)
	FOXO1
				control				overexpression SOX4
			D0	0.000248	0.00019	0.00031		0.00021	0.000269	0.00032
			D4	0.0045	0.004	0.006		0.009	0.012	0.011
	biological replicates
	Results were presented as means ±SEM; Student’s t-test; * indicates P<0.05,
