# Supplementary material for: SOX4 facilitates PGR protein stability and FOXO1 expression conducive for human endometrial decidualization
Source: eLife journal article supplement (doi:10.7554/elife.72073), 2022-03-04
Supplement: supp [file Figure 5A.xlsx]

## Sheet: Sheet1
mRNA levels of PGR after SOX4 knockout in decidualized immortalized HESCs at indicated time points after the E2, MPA and cAMP treatment.
relative to Gapdh(△△CT)
	PGR			WT				KO
			D0	0.0001344	0.0001744	0.0001542		0.0001942	0.0001742	0.0001315
			D2	0.0006249	0.0005549	0.0003357		0.0005357	0.0004357	0.0004177
			D4	0.0007249	0.0006249	0.0010357		0.0009357	0.0007357	0.00133636
			D6	0.001689	0.001989	0.0018023		0.002123	0.001723	0.00153636
	biological replicates
	Results were presented as means ±SEM; Student’s t-test; * indicates P<0.05, ** indicates P<0.005, *** indicates P<0.0001
