# Supplementary material for: SOX4 facilitates PGR protein stability and FOXO1 expression conducive for human endometrial decidualization
Source: eLife journal article supplement (doi:10.7554/elife.72073), 2022-03-04
Supplement: supp [file Figure 5B.xlsx]

## Sheet: Sheet1
Protein levels of PGR in undecidualized and decidualized Immortalized HESCs after SOX4 knockout at indicated time points.
relative density over GAPDH
			WT						KO-SOX4
		SOX4	D0	0.369772	0.471513	0.491537		SOX4	D0	0.00328976	0.00302092	0.00187022
			D2	1.32078	1.09745	0.95218			D2	0	0.00528757	0.00338844
			D4	1.31758	1.27056	1.06991			D4	0.00449341	0.00487109	0.00450372
			D6	2.24821	1.54654	1.67632			D6	0.00479805	0.00465241	0.00214768
		PGR	D0	0.354575	0.21088	0.319436		PGR	D0	0.0074963	0.005741	0.00790156
			D2	3.01748	2.10974	2.29599			D2	1.05826	0.754582	0.946536
			D4	2.78103	2.13023	2.98976			D4	1.05893	0.809206	0.868721
			D6	3.55061	2.50526	2.64308			D6	0.923093	0.810159	0.576924
	biological replicates
	Results were presented as means ±SEM; Student’s t-test; * indicates P<0.05, ** indicates P<0.005, *** indicates P<0.0001
