# Supplementary material for: SOX4 facilitates PGR protein stability and FOXO1 expression conducive for human endometrial decidualization
Source: eLife journal article supplement (doi:10.7554/elife.72073), 2022-03-04
Supplement: supp [file Figure 5C.xlsx]

## Sheet: Sheet1
Protein levels of PGR in the presence of shSOX4 or shSOX4 and MG132 after HESCs cultured with EPC 2 days. MG-132 is added 6 hours before collecting the immortalized cells.
relative density over GAPDH
	PGR
			shControl	shSOX4+DMSO	shSOX4+MG132
			3.46771	0.832347	2.79974
			2.12898	1.20447	2.03273
			2.69173	0.696957	2.09227
	biological replicates
	Results were presented as means ±SEM; One-Way Anova; * indicates P<0.05, ** indicates P<0.005, *** indicates P<0.0001
