# Supplementary material for: SOX4 facilitates PGR protein stability and FOXO1 expression conducive for human endometrial decidualization
Source: eLife journal article supplement (doi:10.7554/elife.72073), 2022-03-04
Supplement: supp [file Figure 5D.xlsx]

## Sheet: Sheet1
Protein levels of PGR in the presence of protein synthesis inhibitor cycloheximide (CHX) in SOX4 knockdown cells.
relative density over GAPDH
		Control+CHX					shSOX4+CHX
		0h	3h	6h	9h		0h	3h	6h	9h
		2.11569	1.94421	1.57462	1.35888		1.59088	0.954	0.130595	0.076797
		2.99904	2.55081	2.55196	2.234		2.5	1.12564	0.141396	0.087
		1.78185	1.3118	1.29397	1.1718		1.53993	0.7213	0.0642144	0.06
	biological replicates
	Results were presented as means ±SEM; One-Way Anova; * indicates P<0.05, ** indicates P<0.005, *** indicates P<0.0001
