# Supplementary material for: SOX4 facilitates PGR protein stability and FOXO1 expression conducive for human endometrial decidualization
Source: eLife journal article supplement (doi:10.7554/elife.72073), 2022-03-04
Supplement: supp [file Figure 6B.xlsx]

## Sheet: Sheet1
mRNA levels of HERC4 in the absence of SOX4 by qPCR
relative to Gapdh(△△CT)
		HERC4		Control		siHERC4
				0.025		0.045
				0.027		0.054
				0.0176		0.048
	biological replicates
	Results were presented as means ±SEM; Student’s t-test; * indicates P<0.05,** indicates P<0.005,*** indicates P<0.0001.
