# Supplementary material for: SOX4 facilitates PGR protein stability and FOXO1 expression conducive for human endometrial decidualization
Source: eLife journal article supplement (doi:10.7554/elife.72073), 2022-03-04
Supplement: supp [file Figure 6C.xlsx]

## Sheet: Sheet1
Protein levels of HERC4 in the absence of SOX4 by Western-blot
relative density over GAPDH
				shControl					shSOX4
				D0	0.891279	1.01382	0.9		D0	0.312588	0.21099	0.289963
				D2	1.51363	1.9288	1.50987		D2	0.244682	0.322305	0.263987
				D4	1.99865	2.3	2.10012		D4	0.292595	0.364701	0.300123
				D6	2.90005	2.8	2.8998		D6	0.564117	0.257209	0.541912
				D0	0.826534	1.3412	0.830005		D0	2.13081	2.474	2.34001
				D2	0.898898	1.33563	0.910128		D2	2.353	2.90811	2.34978
				D4	0.639533	1.3421	0.640135		D4	2.153	2.56661	2.34987
				D6	0.9078	0.870341	0.910016		D6	1.34453	1.5863	1.35
	biological replicates
	Results were presented as means ±SEM; Student’s t-test; * indicates P<0.05,** indicates P<0.005,*** indicates P<0.0001.
