# Supplementary material for: SOX4 facilitates PGR protein stability and FOXO1 expression conducive for human endometrial decidualization
Source: eLife journal article supplement (doi:10.7554/elife.72073), 2022-03-04
Supplement: supp [file Figure 6J.xlsx]

## Sheet: Sheet1
Protein of PGR after HERC4 overexpression in 293T cells
relative density over GAPDH
		PGR
					control	0.876172	1.52262	0.965965
					Overpression-HERC4	0.351197	0.627453	0.50864
	biological replicates
	Results were presented as means ±SEM; Student’s t-test; * indicates P<0.05,** indicates P<0.005.*** indicates P<0.0001.
