# Supplementary material for: SOX4 facilitates PGR protein stability and FOXO1 expression conducive for human endometrial decidualization
Source: eLife journal article supplement (doi:10.7554/elife.72073), 2022-03-04
Supplement: supp [file Figure 6K.xlsx]

## Sheet: Sheet1
PGR protein levels at the present of HERC4 overexpression and in HERC4 knockdown decidualized immortalized HESCs for 2 days.
relative density over GAPDH
				PGR
				a	OE-Control	2.47392	2.35248	2.1468
				b	OE-HERC4	1.6876	0.87972	0.808565
				c	siControl	2.40081	2.43215	1.64083
				d	siHERC 4	4.01396	3.9666	3.40965
				HERC4
				a	OE-Control	1.00035	0.754723	0.858154
				b	OE-HERC4	2.10083	1.27812	1.48103
				c	siControl	0.933611	0.750122	0.842623
				d	siHERC 4	0.498885	0.323992	0.395211
	biological replicates
	Results were presented as means ±SEM; Student’s t-test and One-Way Anova; * indicates P<0.05,** indicates P<0.005.*** indicates P<0.0001.
