# Supplementary material for: SOX4 facilitates PGR protein stability and FOXO1 expression conducive for human endometrial decidualization
Source: eLife journal article supplement (doi:10.7554/elife.72073), 2022-03-04
Supplement: supp [file Figure 6L.xlsx]

## Sheet: Sheet1
Protein levels of PGR, HERC4 and SOX4 after SOX4 and/or HERC4 knockdown in decidualized immortalized HESCs for 2 days.
relative density over GAPDH
				PGR
				a	shControl	2.53349	3.07978	2.0725
				b	shSOX4	1.06637	0.992989	0.723628
				c	shSOX4+siHERC4	2.59744	1.98177	1.3962
				HERC4
				a	shControl	1.05168	1.06545	0.683178
				b	shSOX4	2.11756	2.29598	1.5848
				c	shSOX4+siHERC4	0.602083	0.382659	0.338342
				SOX4
				a	shControl	1.65097	1.81641	1.63079
				b	shSOX4	0.482986	0.652236	0.463245
				c	shSOX4+siHERC4	0.44314	0.454154	0.403214
	biological replicates
	Results were presented as means ±SEM; Student’s t-test and One-Way Anova; * indicates P<0.05,** indicates P<0.005.*** indicates P<0.0001.
