# Supplementary material for: SOX4 facilitates PGR protein stability and FOXO1 expression conducive for human endometrial decidualization
Source: eLife journal article supplement (doi:10.7554/elife.72073), 2022-03-04
Supplement: supp [file Figure 6M.xlsx]

## Sheet: Sheet1
The protein half-life of PGR after HERC4 knockdown at the present of protein synthesis inhibitor cycloheximide (CHX) in 2 days decidualized immortalized HESCs
relative density over GAPDH
			Control+CHX					siHERC4+CHX
			0h	4h	8h	12h		0h	4h	8h	12h
			2.02193	1.567	1.3711	0.886491		2.04111	2.2161	1.42463	0.906922
			2.5069	1.878	1.26934	0.562694		2.52577	2.00267	1.93353	1.51823
			2.05305	1.3	1.14053	0.697436		2.00566	1.89557	1.31452	0.784191
	biological replicates
