# Supplementary material for: SOX4 facilitates PGR protein stability and FOXO1 expression conducive for human endometrial decidualization
Source: eLife journal article supplement (doi:10.7554/elife.72073), 2022-03-04
Supplement: supp [file Figure 6O.xlsx]

## Sheet: Sheet1
The protein half-life of PGR after SOX4 and/or HERC4 knockdown at the present of protein synthesis inhibitor cycloheximide (CHX) in 2 days decidualized immortalized HESCs. The value for relative protein level is band quantification of indicted protein, relative to GAPDH.
relative density over GAPDH
	Control+CHX					Control+shSOX4					Control+shSOX4+siHERC4
	0h	4h	8h	12h		0h	4h	8h	12h		0h	4h	8h	12h
	2.33899	2.49885	2.08968	0.688524		1.39251	0.54989	0.348358	0.1226		2.76898	1.91536	1.32907	1.13513
	2.91777	2.41514	1.83665	1.20665		1.93651	0.301469	0.201189	0.0929016		2.80174	2.58113	1.98848	1.10459
	2.27643	1.61683	1.25009	0.830757		1.80489	0.433237	0.124085	0.07856		1.96443	1.81002	1.46491	0.790123
	biological replicates
	Results were presented as means ±SEM; Student’s t-test ; * indicates P<0.05,** indicates P<0.005.*** indicates P<0.0001.
