# Supplementary material for: SOX4 facilitates PGR protein stability and FOXO1 expression conducive for human endometrial decidualization
Source: eLife journal article supplement (doi:10.7554/elife.72073), 2022-03-04
Supplement: supp [file Figure 7B.xlsx]

## Sheet: Sheet1
Protein levels of different fragments of PGR (Myc tagged F1-F4) at the present of HERC4 in 293T cells.
relative density over GAPDH
			Control					FLAG-HERC4+
			F1	4.98684	1.69742	2.54051		F1	4.6537	1.35354	2.50054
			F2	4.89118	1.65212	1.97838		F2	4.534	2.1364	1.73465
			F3	2.52791	1.56947	1.33426		F3	0.746628	0.445001	0.419616
			F4	2.3013	1.9483	0.891987		F4	2.64427	1.65963	0.760716
	biological replicates
	Results were presented as means ±SEM; Student’s t-test ; * indicates P<0.05,** indicates P<0.005.*** indicates P<0.0001.
