# Supplementary material for: SOX4 facilitates PGR protein stability and FOXO1 expression conducive for human endometrial decidualization
Source: eLife journal article supplement (doi:10.7554/elife.72073), 2022-03-04
Supplement: supp [file Figure 7D.xlsx]

## Sheet: Sheet1
Protein levels of PGR after Lysine mutant to Arginine in DBD with HERC4 over-expression in 293T cells. The value for relative protein level is band quantification of indicted protein, relative to GAPDH.
relative density over GAPDH
			WT	1.93009	1.93144	1.28188
		FLAG-HERC4+	WT	0.177572	0.329743	0.235352
		FLAG-HERC4+	K656R	0.420716	0.187275	0.181897
		FLAG-HERC4+	K588R	1.12414	1.6761	1.15666
		FLAG-HERC4+	K592R	0.167865	0.226243	0.099876
		FLAG-HERC4+	K613R	1.41697	1.5775	1.20811
		FLAG-HERC4+	K617R	1.56536	1.84724	1.14426
		FLAG-HERC4+	K626R	0.266885	0.214268	0.183904
		FLAG-HERC4+	K638R	1.30869	2.00183	0.737265
		FLAG-HERC4+	K640-641R	0.492907	0.119546	0.104457
	biological replicates
	Results were presented as means ±SEM; One-Way Anova ; * indicates P<0.05,** indicates P<0.005.*** indicates P<0.0001.
