# Supplementary material for: SOX4 facilitates PGR protein stability and FOXO1 expression conducive for human endometrial decidualization
Source: eLife journal article supplement (doi:10.7554/elife.72073), 2022-03-04
Supplement: supp [file Figure 8A.xlsx]

## Sheet: Sheet1
Expression of PRL in mid-secretory endometrium from control (n=12) and EMS-RIF (n = 12).
relative to Gapdh(△△CT)
	PRL
		control	EMS-RIF
		0.0045	0.0025
		0.0035	0.00065
		0.0015	0.0006
		0.0022	0.00044
		0.003	0.0017
		0.0025	0.00075
		0.0047	0.00082
		0.0039	0.00044
		0.0017	0.001
		0.0019	0.00076
		0.0021	0.0032
		0.00305	0.00445
	Results were presented as means ±SEM; Student’s t-test; * indicates P<0.05，** indicates P<0.005*** indicates P<0.0001
