# Supplementary material for: SOX4 facilitates PGR protein stability and FOXO1 expression conducive for human endometrial decidualization
Source: eLife journal article supplement (doi:10.7554/elife.72073), 2022-03-04
Supplement: supp [file Figure 8B.xlsx]

## Sheet: Sheet1
Expression of IGFBP1 in mid-secretory endometrium from control (n=12) and EMS-RIF (n = 12).
relative to Gapdh(△△CT)
	IGFBP1
		control	EMS-RIF
		0.002799	0.0003
		0.001869	0.00071
		0.002623	0.001645
		0.000414	0.0026351
		0.00169	0.0005
		0.001499	0.002314
		0.00319	3.7e-05
		0.00158	5.5e-05
		0.00226	0.00086
		0.00096	0.00029
		0.002	0.00041
		0.00152	0.000165
	Results were presented as means ±SEM; Student’s t-test; * indicates P<0.05，** indicates P<0.005*** indicates P<0.0001
