# Supplementary material for: SOX4 facilitates PGR protein stability and FOXO1 expression conducive for human endometrial decidualization
Source: eLife journal article supplement (doi:10.7554/elife.72073), 2022-03-04
Supplement: supp [file Figure 8C.xlsx]

## Sheet: Sheet1
Expression of PGR in mid-secretory endometrium from control (n=12) and EMS-RIF (n = 12).
relative to Gapdh(△△CT)
	PGR
		control	EMS-RIF
		0.00939	0.00355
		0.0085	0.0066
		0.004	0.0095
		0.002	0.008
		0.009	0.0046
		0.0081	0.01
		0.005	0.0028
		0.00999	0.0056
		0.008	0.011
		0.0045	0.006
		0.007	0.005
		0.006	0.008
	Results were presented as means ±SEM; Student’s t-test; * indicates P<0.05，** indicates P<0.005*** indicates P<0.0001
