# Supplementary material for: SOX4 facilitates PGR protein stability and FOXO1 expression conducive for human endometrial decidualization
Source: eLife journal article supplement (doi:10.7554/elife.72073), 2022-03-04
Supplement: supp [file Figure 8D.xlsx]

## Sheet: Sheet1
Expression of SOX4 in mid-secretory endometrium from control (n=12) and EMS-RIF (n = 12).
relative to Gapdh(△△CT)
	SOX4
		control	EMS-RIF
		0.00172	0.000975
		0.00117	0.0001
		0.0009	8.6e-05
		0.00075	0.0015
		0.00085	0.00054
		0.00142	0.0003
		0.00148	0.00128
		0.00042	0.0002
		0.00062	0.00026
		0.0008	0.00087
		0.0015	0.00023
		0.00053	0.00064
	Results were presented as means ±SEM; Student’s t-test; * indicates P<0.05，** indicates P<0.005*** indicates P<0.0001
