# Supplementary material for: SOX4 facilitates PGR protein stability and FOXO1 expression conducive for human endometrial decidualization
Source: eLife journal article supplement (doi:10.7554/elife.72073), 2022-03-04
Supplement: supp [file Figure 8E.xlsx]

## Sheet: Sheet1
Expression of FOXO1 in mid-secretory endometrium from control (n=12) and EMS-RIF (n = 12).
relative to Gapdh(△△CT)
	FOXO1
		control	EMS-RIF
		0.0013	0.00045
		0.0016	0.00024
		0.00435	0.00399
		0.0036	0.0053
		0.0025	0.0018
		0.0049	0.0011
		0.0033	0.0031
		0.0019	0.0035
		0.0061	0.0008
		0.005	0.0015
		0.0047	0.0021
		0.0026	0.0016
	Results were presented as means ±SEM; Student’s t-test; * indicates P<0.05，** indicates P<0.005*** indicates P<0.0001
