# Supplementary material for: SOX4 facilitates PGR protein stability and FOXO1 expression conducive for human endometrial decidualization
Source: eLife journal article supplement (doi:10.7554/elife.72073), 2022-03-04
Supplement: supp [file Figure 8F.xlsx]

## Sheet: Sheet1
Expression of HERC4 in mid-secretory endometrium from control (n=12) and EMS-RIF (n = 12).
relative to Gapdh(△△CT)
	HERC4
		control	EMS-RIF
		0.00045	0.0013
		0.00024	0.0026
		0.00299	0.00535
		0.0043	0.0036
		0.0018	0.0025
		0.0011	0.0069
		0.0031	0.0033
		0.0035	0.0019
		0.0002	0.0071
		0.0015	0.005
		0.0005	0.0087
		0.0016	0.0036
	Results were presented as means ±SEM; Student’s t-test; * indicates P<0.05，** indicates P<0.005*** indicates P<0.0001
