# Supplementary material for: SOX4 facilitates PGR protein stability and FOXO1 expression conducive for human endometrial decidualization
Source: eLife journal article supplement (doi:10.7554/elife.72073), 2022-03-04
Supplement: supp [file Figure1D.xlsx]

## Sheet: Sheet1
Expression of SOX4 mRNA and protein in decidualized Immortalized HESCs from day 0 to day 6.
relative to Gapdh(△△CT)
				SOX4
			D0	0.0056	0.0044	0.003
			D2	0.0171	0.016	0.02
			D4	0.025	0.026	0.032
			D6	0.031	0.04	0.039
	biological replicates
	Results were presented as means ±SEM; Student’s t-test; * indicates P<0.05, ** indicates P<0.005, *** indicates P<0.0001
