# Supplementary material for: SOX4 facilitates PGR protein stability and FOXO1 expression conducive for human endometrial decidualization
Source: eLife journal article supplement (doi:10.7554/elife.72073), 2022-03-04
Supplement: supp [file Sup Fig 1A.xlsx]

## Sheet: Sheet1
mRNA levels of PGR after SOX4 knockdown in decidualized Primary HESCs at indicated time points after the E2, MPA and cAMP treatment.
relative to Gapdh(△△CT)
	PGR			shControl				shSOX4
			D0	0.0001359	0.0001859	0.0001959		0.0001615	0.0001325	0.0001915
			D2	0.0005751	0.0006751	0.0004751		0.0005177	0.0006177	0.0004167
			D4	0.00146041	0.00156041	0.00136041		0.00143636	0.00133535	0.00163636
			D6	0.00147604	0.00167604	0.00136041		0.00173636	0.00153534	0.00141364
	biological replicates
	Results were presented as means ±SEM; Student’s t-test; * indicates P<0.05, ** indicates P<0.005, *** indicates P<0.0001
