# Supplementary material for: SOX4 facilitates PGR protein stability and FOXO1 expression conducive for human endometrial decidualization
Source: eLife journal article supplement (doi:10.7554/elife.72073), 2022-03-04
Supplement: supp [file Sup Fig 1A.xlsx]

## Sheet: Sheet1
Knockdown efficiency of FOXO1 by siFOXO1.
relative density over GAPDH
		FOXO1			siControl		siFOXO１
					1.06311		0.094376
					1.03881		0.160568
					1.16543		0.184755
	biological replicates
	Results were presented as means ±SEM; Student’s t-test; * indicates P<0.05.** indicates P<0.005，*** indicates P<0.0001
