# Supplementary material for: SOX4 facilitates PGR protein stability and FOXO1 expression conducive for human endometrial decidualization
Source: eLife journal article supplement (doi:10.7554/elife.72073), 2022-03-04
Supplement: supp [file Sup Fig 1B.xlsx]

## Sheet: Sheet1
rotein levels of FOXO1, IGFBP1 and SOX4 after overexpression of SOX4 in the presence of FOXO1 knockdown or not in decidualized hESCs for four days. protein, relative to GAPDH.
relative density over GAPDH
		IGFBP1	a	0.258453	0.399141	0.723751
			b	0.852253	1.16887	1.10359
			c	0.951935	1.20512	1.21424
			d	0.362708	0.475933	0.905577
		FOXO1	a	0.488413	0.492363	0.473118
			b	1.01567	1.31427	1.15189
			c	1.03676	1.38086	1.08779
			d	0.182897	0.364578	0.301634
		SOX4	a	0.414992	0.520217	0.149737
			b	1.0046	0.974287	0.613498
			c	1.11026	1.01686	0.688746
			d	1.21561	1.26695	0.663075
	biological replicates
	Results were presented as means ±SEM; Student’s t-test; * indicates P<0.05, ** indicates P<0.005, *** indicates P<0.0001
