# Supplementary material for: SOX4 facilitates PGR protein stability and FOXO1 expression conducive for human endometrial decidualization
Source: eLife journal article supplement (doi:10.7554/elife.72073), 2022-03-04
Supplement: supp [file Sup Fig 1B.xlsx]

## Sheet: Sheet1
Protein levels of PGR in undecidualized and decidualized Primary HESCs after SOX4 knockdown at indicated time points.
relative density over GAPDH
			shControl						shSOX4
		SOX4	D0	0.507076	0.541776	0.36275		SOX4	D0	0.197254	0.218689	0.13677
			D2	0.54742	0.678836	0.44528			D2	0.230632	0.23	0.172127
			D4	0.693991	0.753942	1.37174			D4	0.222996	0.224885	0.390967
			D6	1.1418	1.08613	2.31952			D6	0.238747	0.232349	0.429749
		PGR	D0	0.057683	0.067906	0.0721088		PGR	D0	0.00315728	0.00568314	0.00343967
			D2	1.65701	1.9016	2.53484			D2	1.00625	1.21729	0.987433
			D4	1.85551	2.13419	2.92951			D4	0.63137	1.031	0.834428
			D6	1.52384	1.99222	2.28415			D6	0.72636	0.488576	0.61163
	biological replicates
	Results were presented as means ±SEM; Student’s t-test; * indicates P<0.05, ** indicates P<0.005, *** indicates P<0.0001
