# Supplementary material for: SOX4 facilitates PGR protein stability and FOXO1 expression conducive for human endometrial decidualization
Source: eLife journal article supplement (doi:10.7554/elife.72073), 2022-03-04
Supplement: supp [file Sup Fig 1C.xlsx]

## Sheet: Sheet1
RNA level of UBR3 in SOX4 knockdown HESCs.
relative to Gapdh(△△CT)
	UBR3
				si-Control		siSOX4
				0.00021		0.000359
				0.000291		0.00032
				0.0002		0.0004
	biological replicates
	Results were presented as means ±SEM; Student’s t-test; * indicates P<0.05，** indicates P<0.005，*** indicates P<0.0001
