# Supplementary material for: SOX4 facilitates PGR protein stability and FOXO1 expression conducive for human endometrial decidualization
Source: eLife journal article supplement (doi:10.7554/elife.72073), 2022-03-04
Supplement: supp [file Sup Fig 1C.xlsx]

## Sheet: Sheet1
SOX4 knockout confirmation by WB
relative density over GAPDH
		SOX4		WT		KO-SOX4
				0.97762		0.024911
				1.72968		0.019457
				1.91666		0.019926
	biological replicates
	Results were presented as means ±SEM; Student’s t-test; * indicates P<0.05，** indicates P<0.005，* **indicates P<0.0001.
