# Supplementary material for: SOX4 facilitates PGR protein stability and FOXO1 expression conducive for human endometrial decidualization
Source: eLife journal article supplement (doi:10.7554/elife.72073), 2022-03-04
Supplement: supp [file Sup Fig 1C.xlsx]

## Sheet: Sheet1
Protein levels of PGR in the presence of proteasome inhibitor MG132 or autophagy inhibitor 3MA in the shControl and shSOX4 HESCs cultured with EPC 2 days.
relative density over GAPDH
	PGR	shControl	shSOX4+DMSO	shSOX4+MG-132	shSOX4+3MA
		2.09301	0.71419	1.83239	0.77367
		2.69276	0.942564	2.42658	1.02427
		1.80885	0.587708	1.75402	0.520761
	biological replicates
	Results were presented as means ±SEM; One-Way Anova; * indicates P<0.05, ** indicates P<0.005, *** indicates P<0.0001
