# Supplementary material for: SOX4 facilitates PGR protein stability and FOXO1 expression conducive for human endometrial decidualization
Source: eLife journal article supplement (doi:10.7554/elife.72073), 2022-03-04
Supplement: supp [file Sup Fig 1E.xlsx]

## Sheet: Sheet1
Knockdown efficiency of HERC4 by siHERC4.
relative density over GAPDH
		HERC4			siControl		siHERC4
					1.34663		0.349151
					1.14951		0.322868
					0.824786		0.2088
	biological replicates
	Results were presented as means ±SEM; Student’s t-test; * indicates P<0.05.** indicates P<0.005，*** indicates P<0.0001
