# Supplementary material for: SOX4 facilitates PGR protein stability and FOXO1 expression conducive for human endometrial decidualization
Source: eLife journal article supplement (doi:10.7554/elife.72073), 2022-03-04
Supplement: supp [file Sup Fig 1F.xlsx]

## Sheet: Sheet1
Protein levels of IGFBP1 in the shSOX4，shSOX4 and siHERC4 treatment.
relative density over GAPDH
	IGFBP1
				shControl	a	1.82922	1.23478	1.42679
				shSOX4	b	0.00931	0.1435	0.231678
				shSOX4+siHERC4	c	0.61987	0.529	0.76789
	biological replicates
	Results were presented as means ±SEM; One-Way Anova; * indicates P<0.05.** indicates P<0.005，*** indicates P<0.0001
