# Supplementary material for: SOX4 facilitates PGR protein stability and FOXO1 expression conducive for human endometrial decidualization
Source: eLife journal article supplement (doi:10.7554/elife.72073), 2022-03-04
Supplement: supp [file Sup Fig 2A.xlsx]

## Sheet: Sheet1
The mRNA level of SOX4-Knockdown efficiency of SOX4 by shRNA.
relative to Gapdh(△△CT)
		SOX4		shControl		shSOX4
				0.0208586		0.00231708
				0.0181473		0.00325818
				0.0194424		0.00398025
				0.0211595		0.00321401
	biological replicates
	Results were presented as means ±SEM; Student’s t-test; * indicates P<0.05，** indicates P<0.005，* **indicates P<0.0001.
