# Supplementary material for: SOX4 facilitates PGR protein stability and FOXO1 expression conducive for human endometrial decidualization
Source: eLife journal article supplement (doi:10.7554/elife.72073), 2022-03-04
Supplement: supp [file Sup Fig 2B.xlsx]

## Sheet: Sheet1
mRNA levels of PRL in undecidualized and decidualized Primary HESCs after SOX4 knockdown at indicated time points after the E2, MPA and cAMP treatment.
relative to Gapdh(△△CT)
	PRL			shControl				shSOX4
			D0	3.85e-05	5.95e-05	2.95e-05		2.81e-05	1.81e-05	3.91e-05
			D2	0.001295	0.0025	0.002185		0.000511	0.0006711	0.000812
			D4	0.01047	0.006047	0.009047		0.003393	0.004893	0.002993
			D6	0.0248614	0.0214	0.018914		0.00816	0.01016	0.008316
	biological replicates
	Results were presented as means ±SEM; Student’s t-test; * indicates P<0.05, ** indicates P<0.005，*** indicates P<0.0001
