# Supplementary material for: SOX4 facilitates PGR protein stability and FOXO1 expression conducive for human endometrial decidualization
Source: eLife journal article supplement (doi:10.7554/elife.72073), 2022-03-04
Supplement: supp [file Sup Fig 2C.xlsx]

## Sheet: Sheet1
mRNA levels of IGFBP1 in undecidualized and decidualized Primary HESCs after SOX4 knockdown at indicated time points after the E2, MPA and cAMP treatment.
relative to Gapdh(△△CT)
	IGFBP1			shControl				shSOX4
			D0	0.000395	0.000595	0.000295		0.000105	0.000205	0.000305
			D2	0.03263	0.040963	0.06063		0.014157	0.021267	0.010957
			D4	0.085418	0.112642	0.085418		0.042479	0.064479	0.0362479
			D6	0.20358	0.156796	0.185796		0.071919	0.091919	0.0861919
	biological replicates
	Results were presented as means ±SEM; Student’s t-test; * indicates P<0.05, ** indicates P<0.005，*** indicates P<0.0001
