# Supplementary material for: SOX4 facilitates PGR protein stability and FOXO1 expression conducive for human endometrial decidualization
Source: eLife journal article supplement (doi:10.7554/elife.72073), 2022-03-04
Supplement: supp [file Sup Fig 2D.xlsx]

## Sheet: Sheet1
Protein levels of IGFBP1 in undecidualized and decidualized Primary HESCs after SOX4 knockdown at indicated time points.
relative density over GAPDH
			shControl						shSOX4
		SOX4	D0	0.658733	0.714484	0.35514		SOX4		0.168119	0.251501	0.185476
			D2	0.581734	0.965404	0.453139				0.22302	0.187052	0.223377
			D4	1.16503	1.99985	1.34639				0.208542	0.496891	0.147377
			D6	1.85434	2.47484	2.20311				0.254986	0.375786	0.439196
		IGFBP1	D0	0.00310922	0.00121473	0.0086496		IGFBP1		0.00377081	0.0059347	0.0033512
			D2	0.0057095	0.008344	0.00113257				0.001528	0.0061917	0.0043631
			D4	0.733561	0.522871	0.570675				0.371127	0.292365	0.364759
			D6	2.40692	1.5011	1.6193				1.2528	0.580805	0.7642
	biological replicates
	Results were presented as means ±SEM; Student’s t-test; * indicates P<0.05, ** indicates P<0.005, *** indicates P<0.0001
