# Supplementary material for: SOX4 facilitates PGR protein stability and FOXO1 expression conducive for human endometrial decidualization
Source: eLife journal article supplement (doi:10.7554/elife.72073), 2022-03-04
Supplement: supp [file Sup Fig 3A.xlsx]

## Sheet: Sheet1
after SOX4 overexpression PRL(mRNA) in undecidualized or decidualized Primary HESCs for 4 days.
relative to Gapdh(△△CT)
	PRL
				control				overexpression SOX4
			D0	0.00015	0.00021	0.00029		0.0005	0.0004	0.0002
			D4	0.0015	0.002	0.003		0.005	0.004	0.006
	biological replicates
	Results were presented as means ±SEM; Student’s t-test; * indicates P<0.05, ** indicates P<0.005，*** indicates P<0.0001
