# Supplementary material for: SOX4 facilitates PGR protein stability and FOXO1 expression conducive for human endometrial decidualization
Source: eLife journal article supplement (doi:10.7554/elife.72073), 2022-03-04
Supplement: supp [file Sup Fig 3B.xlsx]

## Sheet: Sheet1
after SOX4 overexpression IGFBP1(mRNA) in undecidualized or decidualized Primary HESCs for 4 days.
relative to Gapdh(△△CT)
	IGFBP1
				control				overexpression SOX4
			D0	0.0019	0.0013	0.002		0.0037	0.002	0.002
			D4	0.012	0.013	0.02		0.057	0.06	0.08
	biological replicates
	Results were presented as means ±SEM; Student’s t-test; * indicates P<0.05, ** indicates P<0.005，*** indicates P<0.0001
