# Supplementary material for: SOX4 facilitates PGR protein stability and FOXO1 expression conducive for human endometrial decidualization
Source: eLife journal article supplement (doi:10.7554/elife.72073), 2022-03-04
Supplement: supp [file Sup Fig 3C.xlsx]

## Sheet: Sheet1
Protein levels of SOX4 and IGFBP1 in decidualized Primary HESCs for 4 days with control or SOX4 overexpression. Band quantification of SOX4 and IGFBP1 protein, relative to GAPDH.
relative density over GAPDH
				SOX4	D0	0.550686	0.337752	0.449104
					D4	0.86584	0.879549	1.08547
				IGFBP1	D0	0.617046	0.521945	0.546603
					D4	1.00216	1.04985	1.10271
	biological replicates
	Results were presented as means ±SEM; Student’s t-test; * indicates P<0.05, ** indicates P<0.005, *** indicates P<0.0001
