# Supplementary material for: SOX4 facilitates PGR protein stability and FOXO1 expression conducive for human endometrial decidualization
Source: eLife journal article supplement (doi:10.7554/elife.72073), 2022-03-04
Supplement: supp [file Sup Figure 2A.xlsx]

## Sheet: Sheet1
Expression of SOX4 mRNA and protein in decidualized Primary HESCs from day 0 to day 6.
relative to Gapdh(△△CT)
			D0		D2		D4		D6
		SOX4	0.0051		0.0091		0.035		0.061
			0.0042		0.012		0.023		0.05
			0.00301		0.01		0.03		0.045
	biological replicates
	Results were presented as means ±SEM; Student’s t-test; * indicates P<0.05, ** indicates P<0.005, *** indicates P<0.0001
